# Supplementary material for: Nitrate and nitroarene hydrogenations catalyzed by alkaline-earth nickel phosphide clathrates
Source: Royal Society of Chemistry journal article supplement (doi:10.1039/d4dt00332b), 2024-01-01
Supplement: d4dt00332b1.pdf [file d4dt00332b1.pdf]

## Supporting Information

### **Nitrate and Nitroarene Hydrogenations Catalyzed by Alkaline-Earth Nickel Phosphide Clathrates**

Marquix A. S. Adamson,<sup>a</sup> Lin Wei,<sup>a</sup> Philip Yox,<sup>a,b</sup> Fatema H. B. Hafiz,<sup>a</sup> Javier Vela<sup>a,b,\*</sup>

<sup>a</sup>Department of Chemistry, Iowa State University, and <sup>b</sup>Ames National Laboratory, U.S. Department of Energy, Ames, Iowa 50011, United States.

\*email: [vela@iastate.edu](mailto:vela@iastate.edu), phone: 515-294-5536

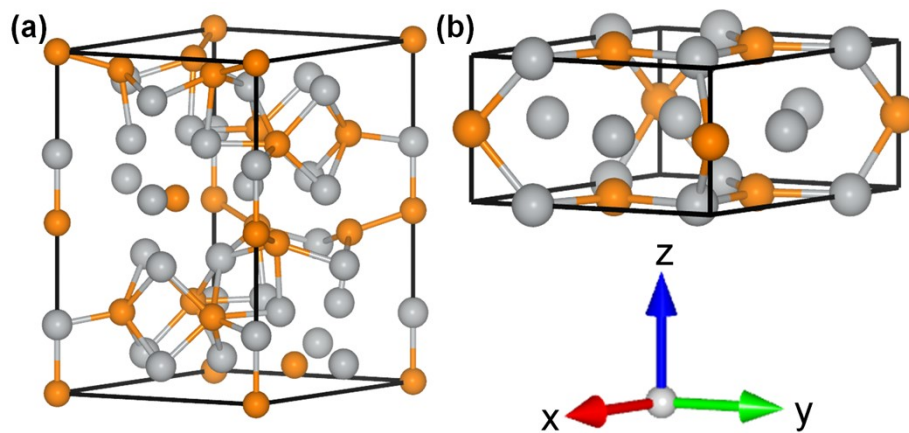

**Figure S1.** Unit cells of crystalline  $\text{Ni}_5\text{P}_4$  (a) and  $\text{Ni}_2\text{P}$  (b). (Ni in gray, P in orange)

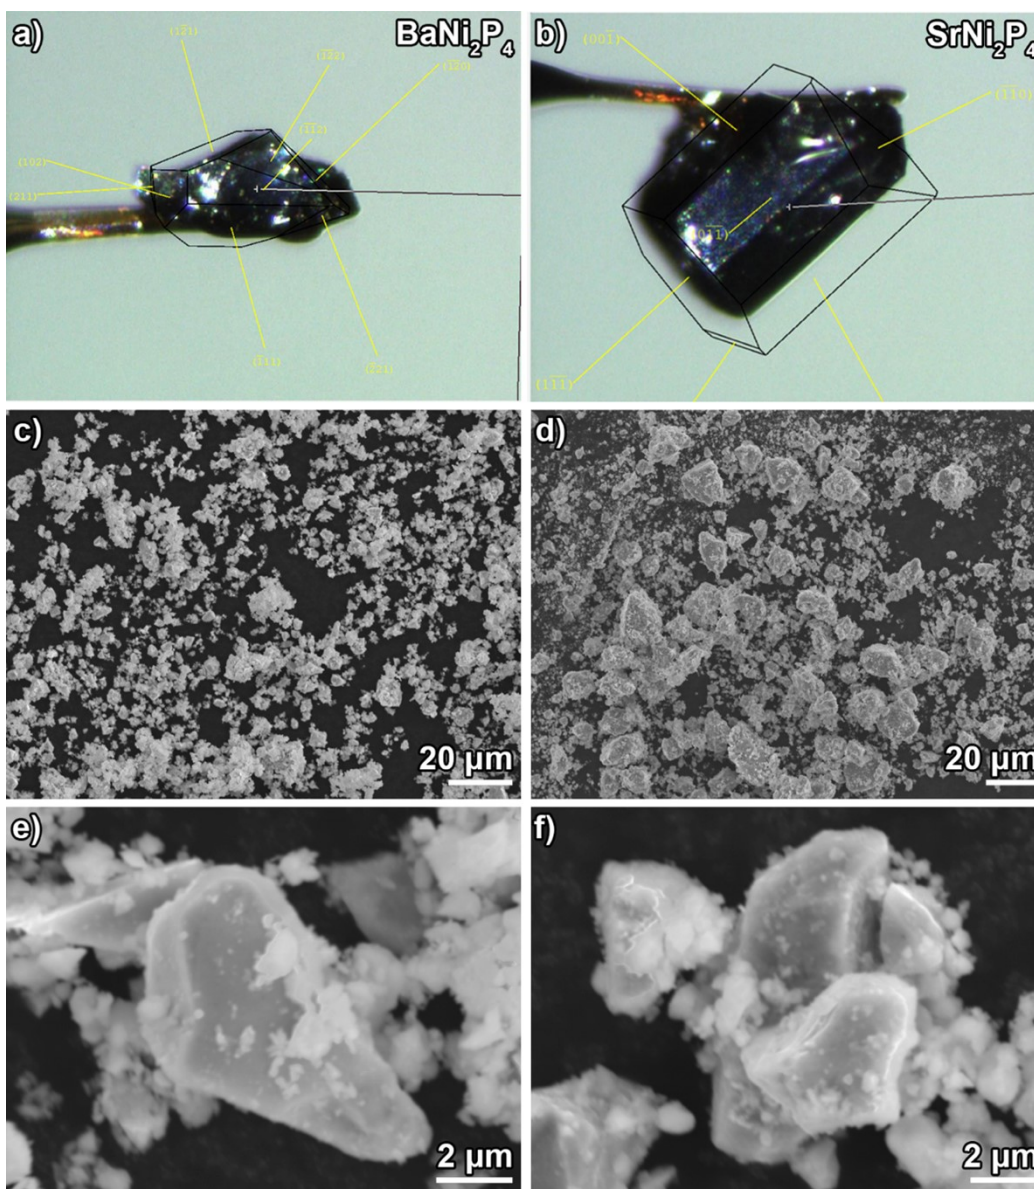

**Figure S2.** Optical and SEM images of (a, c, e)  $\text{BaNi}_2\text{P}_4$  and (b, d, f)  $\text{SrNi}_2\text{P}_4$  before (a and b on top) and after 2 h hand-grinding (middle and bottom c through f).

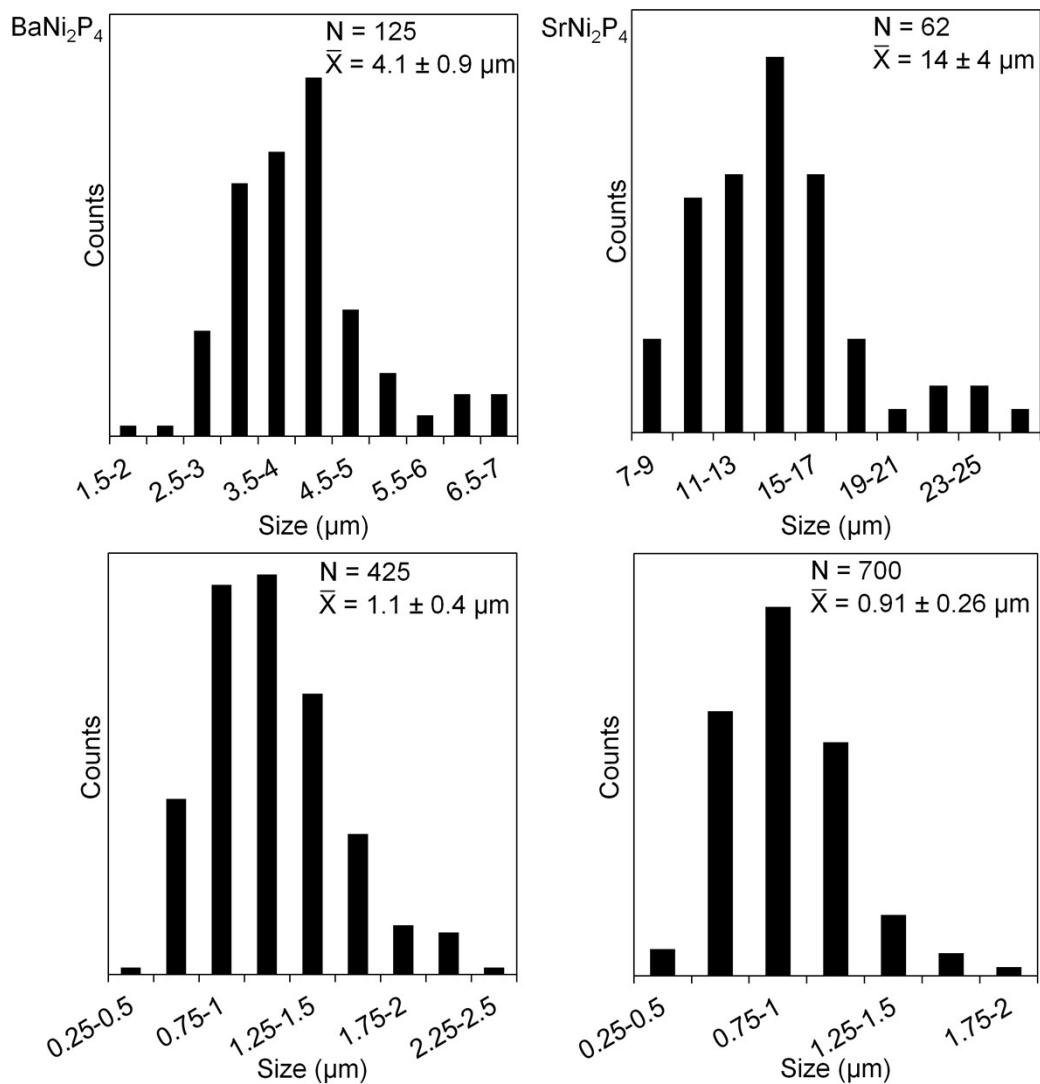

**Figure S3.** Histograms of large (top) and small (bottom) particle size distributions for BaNi<sub>2</sub>P<sub>4</sub> (left) and SrNi<sub>2</sub>P<sub>4</sub> (right) after 2 h hand-grinding.

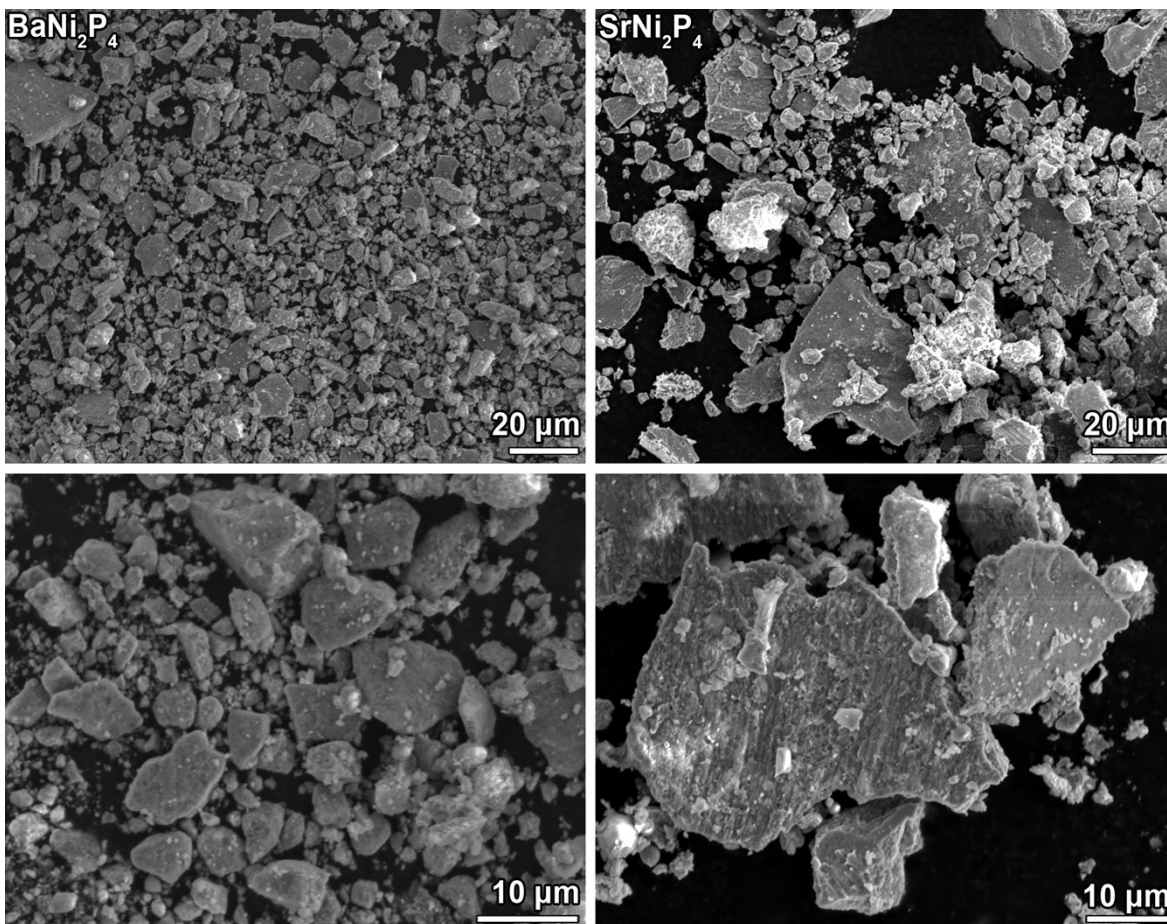

**Figure S4.** Representative SEM images of BaNi<sub>2</sub>P<sub>4</sub> (left) and of SrNi<sub>2</sub>P<sub>4</sub> (right) after 2 h ball-milling.

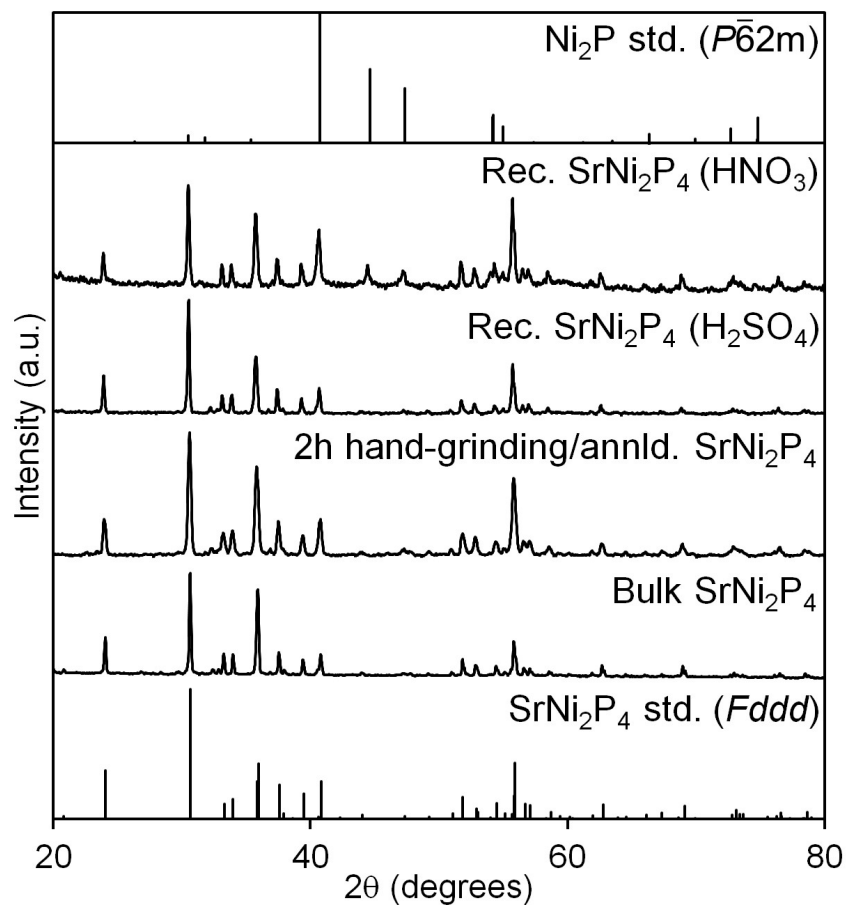

**Figure S5.** Powder XRD of  $\text{SrNi}_2\text{P}_4$  before and after hand-grinding/ $\text{H}_2$ -annealing, as well as after catalysis using different acids. Reference XRD patterns are shown for comparison ( $\text{SrNi}_2\text{P}_4$ , ICSD429359;  $\text{Ni}_2\text{P}$ , ICSD43395).

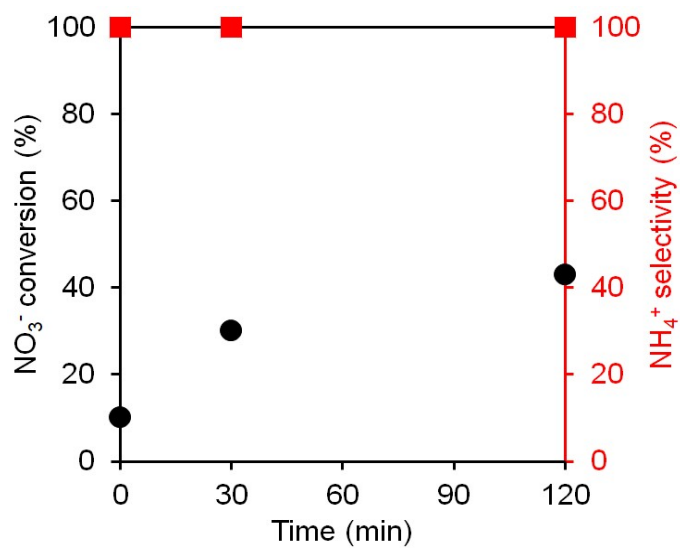

**Figure S6.** Catalytic activity and selectivity observed during NO<sub>3</sub><sup>-</sup> hydrogenation with BaNi<sub>2</sub>P<sub>4</sub> as a function of ball-milling prior to catalysis; decomposition of the clathrate to binary nickel phosphides was observed by XRD (see text).

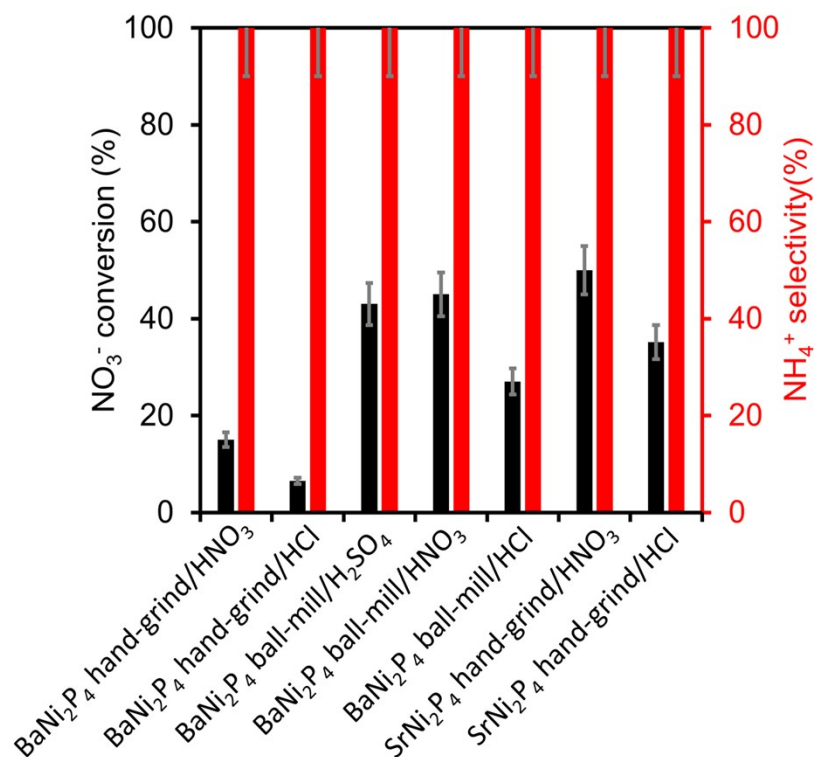

**Figure S7.** Catalytic activity and selectivity observed during NO<sub>3</sub><sup>-</sup> hydrogenation as a function of catalyst and acid used after 12 h. (Conditions: 2 mM NO<sub>3</sub><sup>-</sup>, pH 2, 60 °C; catalysts hand-ground or ball-milled for 2 h and annealed under H<sub>2</sub>, 10 mg catalyst used; see Experimental).



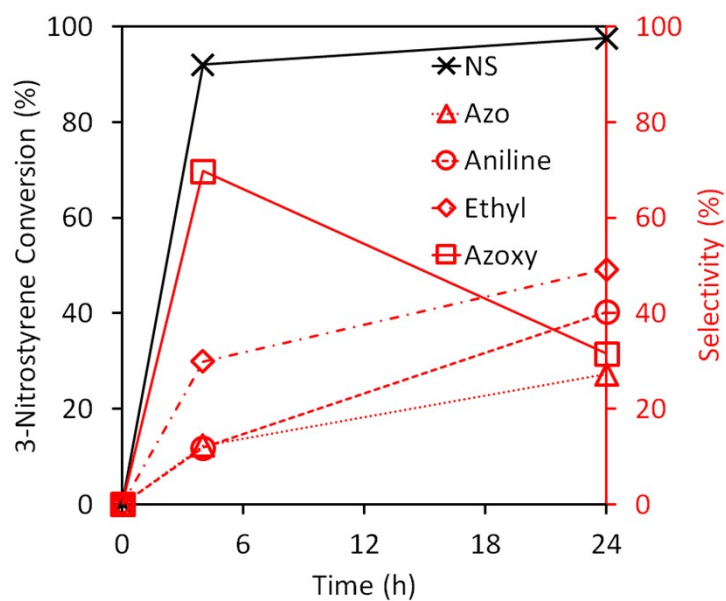

**Figure S8.** 3-Nitrostyrene reduction in the presence of  $\text{SrNi}_2\text{P}_4$ . (Conditions: 50 mM 3-nitrostyrene, ambient temperature; 10 mg of catalyst, 2 h hand-ground and annealed under  $\text{H}_2$ , see Experimental).

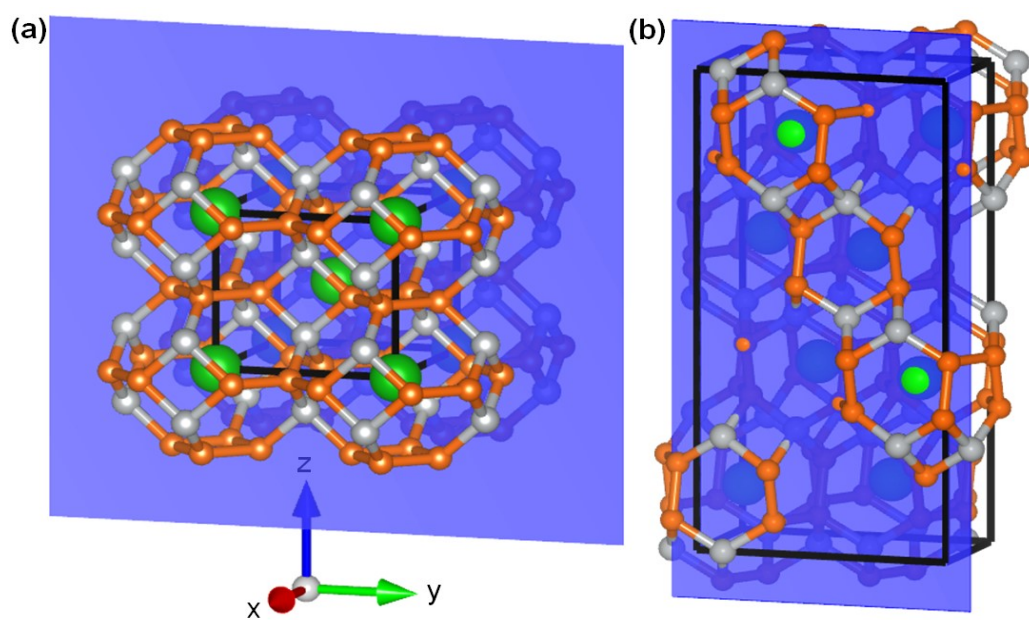

**Figure S9.** Facets of  $\text{BaNi}_2\text{P}_4$  (a) and  $\text{SrNi}_2\text{P}_4$  (b) used to determine the number of active sites on each catalyst surface.

## TOF and TON calculation examples

[BaNi<sub>2</sub>P<sub>4</sub> example – PhNO<sub>2</sub> – 2 h hand-grind; 24 h rxn]

BaNi<sub>2</sub>P<sub>4</sub> unit cell parameters: a = 0.6620 nm, b = 0.6470, c = 0.5785 nm, V = 0.24778 nm<sup>3</sup>, 14 atoms (Z = 2 formula units)

Molar mass of BaNi<sub>2</sub>P<sub>4</sub> = 378.612 g/mol

Density

$$= \frac{378.612 \text{ g}}{1 \text{ mol}} \times \frac{1 \text{ mol}}{6.02 \times 10^{23} \text{ formula units}} \times \frac{2 \text{ formula units}}{1 \text{ unit cell}} \times \frac{1 \text{ unit cell}}{0.24778 \text{ nm}^3} = 5.075 \times 10^{-21} \text{ g/nm}^3$$

$$\text{Volume of an 1150 nm sphere} = \frac{4}{3}\pi r^3 = \frac{4}{3}\pi(575\text{nm})^3 = 796,328,288 \text{ nm}^3$$

$$\text{Surface area of an 1150 nm sphere} = 4\pi r^2 = 4\pi(575\text{nm})^2 = 4,154,756 \text{ nm}^2$$

Surface area per gram of 1150 nm sphere

$$= \frac{4,154,756 \text{ nm}^2}{1 \text{ particle}} \times \frac{1 \text{ particle}}{796,328,288 \text{ nm}^3} \times \frac{1 \text{ nm}^3}{5.075 \times 10^{-21} \text{ g}} = 1.03 \times 10^{18} \text{ nm}^2/\text{g}$$

$$\text{One BaNi}_2\text{P}_4 \text{ formula unit approximate area (001)} = 0.6620 \times 0.6470 = 0.4283 \text{ nm}^2$$

Must divide by 1; there are 2 formula units in the unit cell, but only 1 is at the surface of the cell

Assume 1 BaNi<sub>2</sub>P<sub>4</sub> formula units provides 1 active site, then 10.0 mg catalysts active sites number

$$(10.0 \times 10^{-3})\text{g} \times \frac{1.03 \times 10^{18} \text{ nm}^2}{1 \text{ g}} \times \frac{1 \text{ molecule}}{0.4283 \text{ nm}^2} = 2.40 \times 10^{16} \text{ active sites}$$

$$\text{Moles of catalyst active sites} = \frac{2.40 \times 10^{16} \text{ formula units}}{6.02 \times 10^{23} \text{ formula units/mol}} = 3.99 \times 10^{-8} \text{ mol}$$

$$\text{Turnover number of Exp. 1 (98\% conversion)} = \frac{9.8 \times 10^{-5} \text{ mol Nitrobenzene}}{3.99 \times 10^{-8} \text{ mol Cat.}} = 2456$$

$$\text{Turnover frequency of Exp. 1} = \frac{2456}{24 \text{ hrs}} = 102.3 \text{ h}^{-1}$$

[SrNi<sub>2</sub>P<sub>4</sub> example – 2 h hand-grind; 24 h rxn]

SrNi<sub>2</sub>P<sub>4</sub> unit cell parameters: a = 0.51928 nm, b = 0.95598, c = 1.89575 nm, V = 0.94109 nm<sup>3</sup>, 56 atoms (Z = 8 formula units)

Molar mass of SrNi<sub>2</sub>P<sub>4</sub> = 328.902 g/mol

Density

$$= \frac{328.902 \text{ g}}{1 \text{ mol}} \times \frac{1 \text{ mol}}{6.02 \times 10^{23} \text{ formula units}} \times \frac{8 \text{ formula units}}{1 \text{ unit cell}} \times \frac{1 \text{ unit cell}}{0.94109 \text{ nm}^3} = 4.643 \times 10^{-21} \text{ g/nm}^3$$

$$\text{Volume of a 909.3 nm sphere} = \frac{4}{3}\pi r^3 = \frac{4}{3}\pi(454.65 \text{ nm})^3 = 393,659,010 \text{ nm}^3$$

$$\text{Surface area of a 909.3 nm sphere} = 4\pi r^2 = 4\pi(454.65 \text{ nm})^2 = 2,597,552 \text{ nm}^2$$

Surface area per gram of 909.3 nm sphere

$$= \frac{2,597,552 \text{ nm}^2}{1 \text{ particle}} \times \frac{1 \text{ particle}}{393,659,010 \text{ nm}^3} \times \frac{1 \text{ nm}^3}{4.643 \times 10^{-21} \text{ g}} = 1.42 \times 10^{18} \text{ nm}^2 / \text{g}$$

$$\text{One SrNi}_2\text{P}_4 \text{ formula unit approximate area (100)} = 0.95598 \times 1.89575 = 1.8123 \text{ nm}^2$$

Must divide by 4; there are 8 formula units in the unit cell, but only 4 are the surface of the cell

$$\frac{1.8123 \text{ nm}^2}{4 \text{ formula units at the (100) surface}} = 0.45308 \text{ nm}^2$$

Assume 1 SrNi<sub>2</sub>P<sub>4</sub> formula units provides 1 active site, then 10.0 mg catalysts active sites number

$$(10.0 \times 10^{-3}) \text{ g} \times \frac{1.42 \times 10^{18} \text{ nm}^2}{1 \text{ g}} \times \frac{1 \text{ molecule}}{0.45308 \text{ nm}^2} = 3.13 \times 10^{16} \text{ active sites}$$

$$= \frac{3.13 \times 10^{16} \text{ active sites}}{6.02 \times 10^{23} \text{ active sites/mol}} = 5.21 \times 10^{-8} \text{ mol}$$

Moles of catalyst active sites

$$\text{Turnover number of Exp. 1 (58\% conversion)} = \frac{5.8 \times 10^{-5} \text{ mol Nitrobenzene}}{5.21 \times 10^{-8} \text{ mol Cat.}} = 1114$$

$$\text{Turnover frequency of Exp. 1} = \frac{1114}{24 \text{ hrs}} = 46.4 \text{ h}^{-1}$$

| <b>Table S1.</b> Nitrate and nitroarene reductions using nickel phosphide and clathrate catalysts. |                                     |                                             |                              |       |                |                                                                                                    |                         |                                        |
|----------------------------------------------------------------------------------------------------|-------------------------------------|---------------------------------------------|------------------------------|-------|----------------|----------------------------------------------------------------------------------------------------|-------------------------|----------------------------------------|
| Catalyst                                                                                           | Pretreatment <sup>a</sup>           | Pretreated XRD (size/nm) <sup>b</sup>       | Reactant <sup>c</sup>        | t (h) | Conversion (%) | Product(s) (Selec./%)                                                                              | Recovered XRD (size/nm) | TON <sup>d</sup> (TOF <sup>e</sup> /h) |
| BaNi <sub>2</sub> P <sub>4</sub> <sup>h</sup>                                                      | 2 h Ball-mill, annld. <sup>f</sup>  | 73% NiP (20±6), 27% NiP <sub>2</sub> (27±1) | NO <sub>3</sub> <sup>-</sup> | 12    | 45             | NH <sub>4</sub> <sup>+</sup> (100)                                                                 | -                       | -                                      |
| BaNi <sub>2</sub> P <sub>4</sub> <sup>i</sup>                                                      | 2 h Ball-mill, annld. <sup>f</sup>  | 73% NiP (20±6), 27% NiP <sub>2</sub> (27±1) | NO <sub>3</sub> <sup>-</sup> | 12    | 27             | NH <sub>4</sub> <sup>+</sup> (100)                                                                 | -                       | -                                      |
| SrNi <sub>2</sub> P <sub>4</sub> <sup>i</sup>                                                      | 2 h Hand-grind, annld. <sup>f</sup> | SrNi <sub>2</sub> P <sub>4</sub> (40±15)    | NO <sub>3</sub> <sup>-</sup> | 12    | 35             | NH <sub>4</sub> <sup>+</sup> (100)                                                                 | -                       | -                                      |
| None                                                                                               | -                                   | -                                           | NO <sub>2</sub> <sup>-</sup> | 4     | 99             | NO <sub>3</sub> <sup>-</sup> (9)                                                                   | -                       | -                                      |
| BaNi <sub>2</sub> P <sub>4</sub> <sup>g</sup>                                                      | 2 h Hand-grind, annld. <sup>f</sup> | BaNi <sub>2</sub> P <sub>4</sub> (44±5)     | NO <sub>2</sub> <sup>-</sup> | 4     | 100            | NO <sub>3</sub> <sup>-</sup> (14)                                                                  | -                       | -                                      |
| None                                                                                               | -                                   | -                                           | PhNO <sub>2</sub>            | 16    | 48             | Aniline (2)                                                                                        | -                       | -                                      |
| BaNi <sub>2</sub> P <sub>4</sub>                                                                   | Annld. <sup>f</sup>                 |                                             | PhNO <sub>2</sub>            | 4     | 66             | Aniline (32), azo (19), azoxy (49)                                                                 | -                       | -                                      |
| BaNi <sub>2</sub> P <sub>4</sub>                                                                   | Annld. <sup>f</sup>                 |                                             | PhNO <sub>2</sub>            | 24    | 57             | Aniline (4), azo (2), azoxy (94)                                                                   | -                       | -                                      |
| BaNi <sub>2</sub> P <sub>4</sub>                                                                   | Annld. <sup>f</sup>                 |                                             | 3-Nitrostyrene               | 4     | 98             | Aniline <sup>j</sup> (16), azo <sup>j</sup> (8), azoxy <sup>j</sup> (70), ethyl <sup>k</sup> (28)  | -                       | -                                      |
| BaNi <sub>2</sub> P <sub>4</sub>                                                                   | Annld. <sup>f</sup>                 |                                             | 3-Nitrostyrene               | 24    | 95             | Aniline <sup>j</sup> (28), azo <sup>j</sup> (11), azoxy <sup>j</sup> (62), ethyl <sup>k</sup> (40) | -                       | -                                      |
| SrNi <sub>2</sub> P <sub>4</sub>                                                                   | 2 h Hand-grind, annld. <sup>f</sup> |                                             | 3-Nitrostyrene               | 4     | 92             | Aniline <sup>j</sup> (12), azo <sup>j</sup> (12), azoxy <sup>j</sup> (70), ethyl <sup>k</sup> (30) | -                       | -                                      |
| SrNi <sub>2</sub> P <sub>4</sub>                                                                   | 2 h Hand-grind, annld. <sup>f</sup> |                                             | 3-Nitrostyrene               | 24    | 98             | Aniline <sup>j</sup> (40), azo <sup>j</sup> (27), azoxy <sup>j</sup> (32), ethyl <sup>k</sup> (50) | -                       | 1882 (78)                              |

<sup>a</sup>10 mg cat. <sup>b</sup>Estimated from XRD peak widths using the Scherrer equation when <100 nm; reported in nm unless specified otherwise. <sup>c</sup>2.0 mM NO<sub>3</sub><sup>-</sup> or NO<sub>2</sub><sup>-</sup>, 60 °C, pH = 2/H<sub>2</sub>O; or 50 mM nitroarene, RT/EtOH. <sup>d</sup>TON = moles of converted reactant / moles of surface-active catalyst sites (calculated for select cases, only); <sup>e</sup>TOF = TON/catalysis time. <sup>f</sup>1 atm H<sub>2</sub>, 1h, 400 °C. Adjusted pH with: <sup>g</sup>H<sub>2</sub>SO<sub>4</sub>, <sup>h</sup>HNO<sub>3</sub>, <sup>i</sup>HCl. <sup>j</sup>Multiple products containing functional group (see SI). <sup>k</sup>Multiple Ph-vinyl (C-C) breaking products.

**Table S2.** 3-Nitrostyrene reduction products using clathrate catalysts.

| Anilines                                                                          | Azo arenes                                                                        | Azoxy arenes                                                                      | Vinyl arenes                                                                        | Ethyl arenes                                                                          | Devinylation                                                                          |
|-----------------------------------------------------------------------------------|-----------------------------------------------------------------------------------|-----------------------------------------------------------------------------------|-------------------------------------------------------------------------------------|---------------------------------------------------------------------------------------|---------------------------------------------------------------------------------------|
| 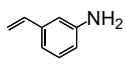 |  |  |    |     |    |
|  |  |  |   |    |    |
|  |  |  |   |    |    |
|                                                                                   |  |  |   |    |    |
|                                                                                   |  |  |   |    |    |
|                                                                                   |  |  |   |    |    |
|                                                                                   |                                                                                   |                                                                                   |  |   |   |
|                                                                                   |                                                                                   |                                                                                   |                                                                                     |  |  |

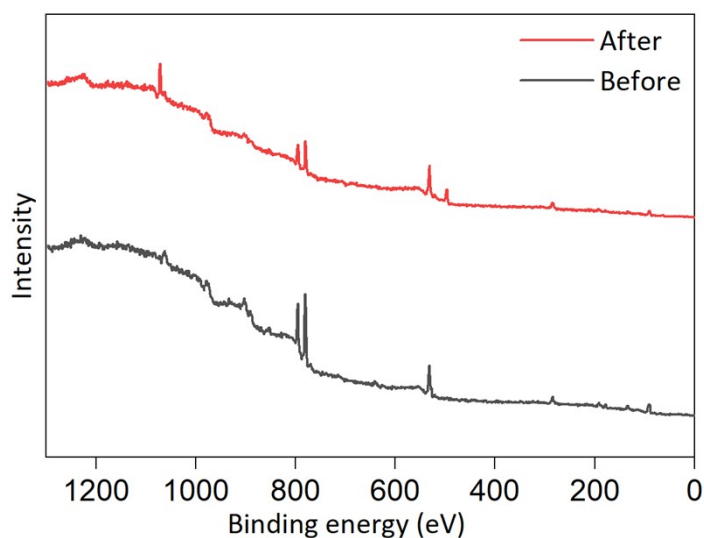

**Figure S10.** XPS survey spectra of  $\text{BaNi}_2\text{P}_4$  before (black) and after (red) catalytic hydrogenation of 3-nitrostyrene. (Conditions: 50 mM 3- $\text{NO}_2$ -styrene, R.T.; catalyst hand-ground for 2 h and annealed under  $\text{H}_2$ ).

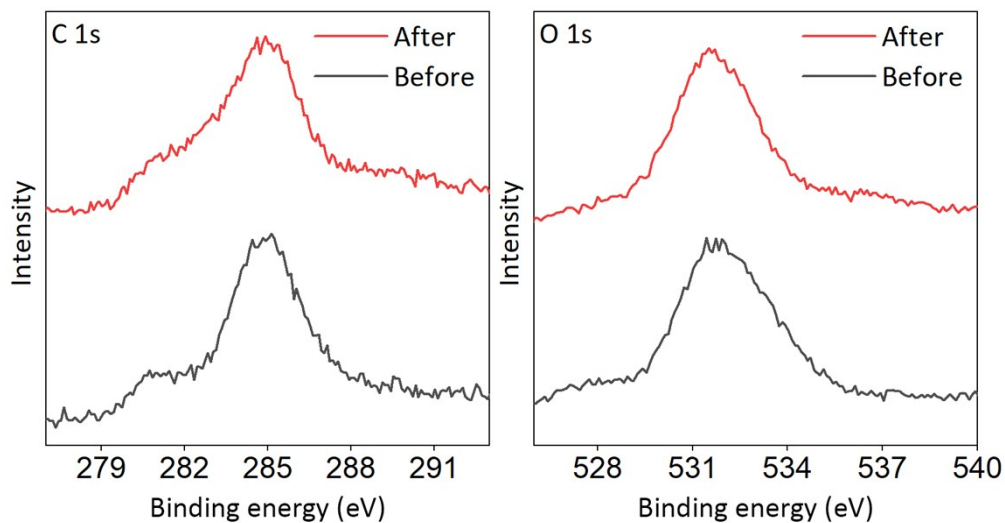

**Figure S11.** O 1s and C 1s peak XPS regions of  $\text{BaNi}_2\text{P}_4$  before (black) and after (red) catalytic hydrogenation of 3-nitrostyrene. (Conditions: 50 mM 3- $\text{NO}_2$ -styrene, R.T.; catalyst hand-ground for 2 h and annealed under  $\text{H}_2$ ).
